# Supplementary material
Source: HighWire-hosted journal article supplement (https://qualitysafety.bmj.com/content/31/11/818)
Supplement: inline-supplementary-material-1 [file inline-supplementary-material-1.pdf]

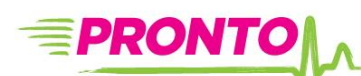

## Supplementary File 1: Components of the Clinical Practice Guideline

### National Safety and Quality Health Service Standard for Recognition and Response to Clinical Deterioration

<https://www.safetyandquality.gov.au/standards/nsqhs-standards/recognising-and-responding-acute-deterioration-standard>

- **National Consensus Statement**

<http://www.safetyandquality.gov.au/our-work/recognising-and-responding-to-clinical-deterioration/implementing-r-and-r-systems/the-national-consensus-statement/>

- **A Guide to Support Implementation of the National Consensus Statement**

<http://www.safetyandquality.gov.au/our-work/recognising-and-responding-to-clinical-deterioration/implementing-r-and-r-systems/implementation-guide/>

- **Quick Start Guides to Implementation of National Consensus Statement**

<http://www.safetyandquality.gov.au/our-work/recognising-and-responding-to-clinical-deterioration/implementing-r-and-r-systems/quick-start-guides-to-implementation-of-the-national-consensus-statement/>

### Educational Resources

- **FIRST2ACT**

An online stimulation learning package created to develop enrolled, registered and student nurses' education around clinical decision making and recognition of deteriorating patients by using (timed) simulation scenarios.

<http://first2actweb.com/>

- **COMPASS**

An advanced educational program designed to enhance the knowledge of the health care professional in the recognition of deteriorating patients. This educational package aims to enable the health care professional to gain an understanding in altered observations and the patient's underlying pathophysiology, introduces methods and management plans for communication between multidisciplinary teams and aims to create confidence in the health care professional when recognising and managing deteriorating patients.

<http://www.health.act.gov.au/professionals/compass>
