# Supplementary material
Source: HighWire-hosted journal article supplement (https://qualitysafety.bmj.com/content/31/11/818)
Supplement: inline-supplementary-material-2 [file inline-supplementary-material-2.pdf]

**Supplementary File 2: Hospital Escalation Criteria**

| <b>Pre-MET Criteria</b>                      | <b>Hospital A</b>                          | <b>Hospital B</b>                                               | <b>Hospital C</b>                        | <b>Hospital D</b>                          |
|----------------------------------------------|--------------------------------------------|-----------------------------------------------------------------|------------------------------------------|--------------------------------------------|
| Respiratory Rate                             | 6-12 breaths/min<br>25-29 breaths/min      | 7-10 breaths/min<br>25-35 breaths/min                           | 8-10 breaths/min<br>25-29 breaths/min    | 6-12 breaths/min<br>25-29 breaths/min      |
| Oxygen Saturation                            | 91-93%                                     | 91-93%                                                          | 91-93%                                   | 91-93%                                     |
| Systolic Blood Pressure                      | 180-199mmHg                                | 91-100mmHg or<br>180-199mmHg                                    | 180-199mmHg                              | 180-199mmHg                                |
| Heart Rate                                   | 41-50beats/min<br>100-130beats/min         | 41-50beats/min<br>120-139beats/min                              | 100-130<br>beats/min                     | 41-50 beats/min<br>100-130beats/min        |
| Temperature                                  | <36 <sup>0</sup> C or >38.3 <sup>0</sup> C | <36 <sup>0</sup> C or >38 <sup>0</sup> C                        | <36 <sup>0</sup> C or >38 <sup>0</sup> C | <36 <sup>0</sup> C or >38.3 <sup>0</sup> C |
| Conscious state                              |                                            | Previously alert<br>now only<br>responsive to<br>verbal stimuli |                                          |                                            |
| Unrelenting or new chest pain                | ✓                                          | ✓                                                               |                                          | ✓                                          |
| New or unrelenting shortness of breath       | ✓                                          |                                                                 | ✓                                        | ✓                                          |
| Increased and Unexpected fluid or Blood loss | ✓                                          |                                                                 | ✓                                        | ✓                                          |
| Concern                                      | ✓                                          |                                                                 | ✓                                        | ✓                                          |

| <b>MET Criteria</b>           | <b>Hospital A</b>                 | <b>Hospital B</b>                               | <b>Hospital C</b>                 | <b>Hospital D</b>                 |
|-------------------------------|-----------------------------------|-------------------------------------------------|-----------------------------------|-----------------------------------|
| Airway                        | Threatened                        | Threatened                                      | Difficulty breathing              | Threatened                        |
| Respiratory Rate              | <6 breaths/min or >30 breaths/min | <6 breaths/min or >36 breaths/min               | <8 breaths/min or >30 breaths/min | <6 breaths/min or >30 breaths/min |
| Oxygen Saturation             | <90% on oxygen                    | <90% on oxygen                                  | <90% on oxygen                    | <90% on oxygen                    |
| Systolic Blood Pressure       | <90mmHg or >200 mmHg              | <90mmHg or >200 mmHg                            | <90mmHg                           | <90mmHg or >200 mmHg              |
| Heart Rate                    | >130 beats/min                    | <40 beats/min >140 beats/min                    | <50 beats/min >130 beats/min      | >130 beats/min                    |
| Conscious state               | Any unexpected decrease.          | Any unexpected decrease.<br>Fall in GCS>2points | Any unexpected decrease.          | Any unexpected decrease.          |
| Fitting                       | ✓                                 | ✓                                               | ✓                                 | ✓                                 |
| Unrelenting or new chest pain |                                   |                                                 | ✓                                 |                                   |
| Pain                          |                                   | Uncontrolled                                    |                                   |                                   |
| Concern                       | ✓                                 | ✓                                               | ✓                                 | ✓                                 |

| <b>Cardiac Arrest Criteria</b> | <b>Hospital A</b> | <b>Hospital B</b> | <b>Hospital C</b> | <b>Hospital D</b> |
|--------------------------------|-------------------|-------------------|-------------------|-------------------|
| Cardiorespiratory Arrest       | ✓                 | ✓                 | ✓                 | ✓                 |
| Unresponsive                   | ✓                 | ✓                 | ✓                 | ✓                 |
