# Supplementary material
Source: HighWire-hosted journal article supplement (https://qualitysafety.bmj.com/content/31/11/818)
Supplement: inline-supplementary-material-3 [file inline-supplementary-material-3.pdf]

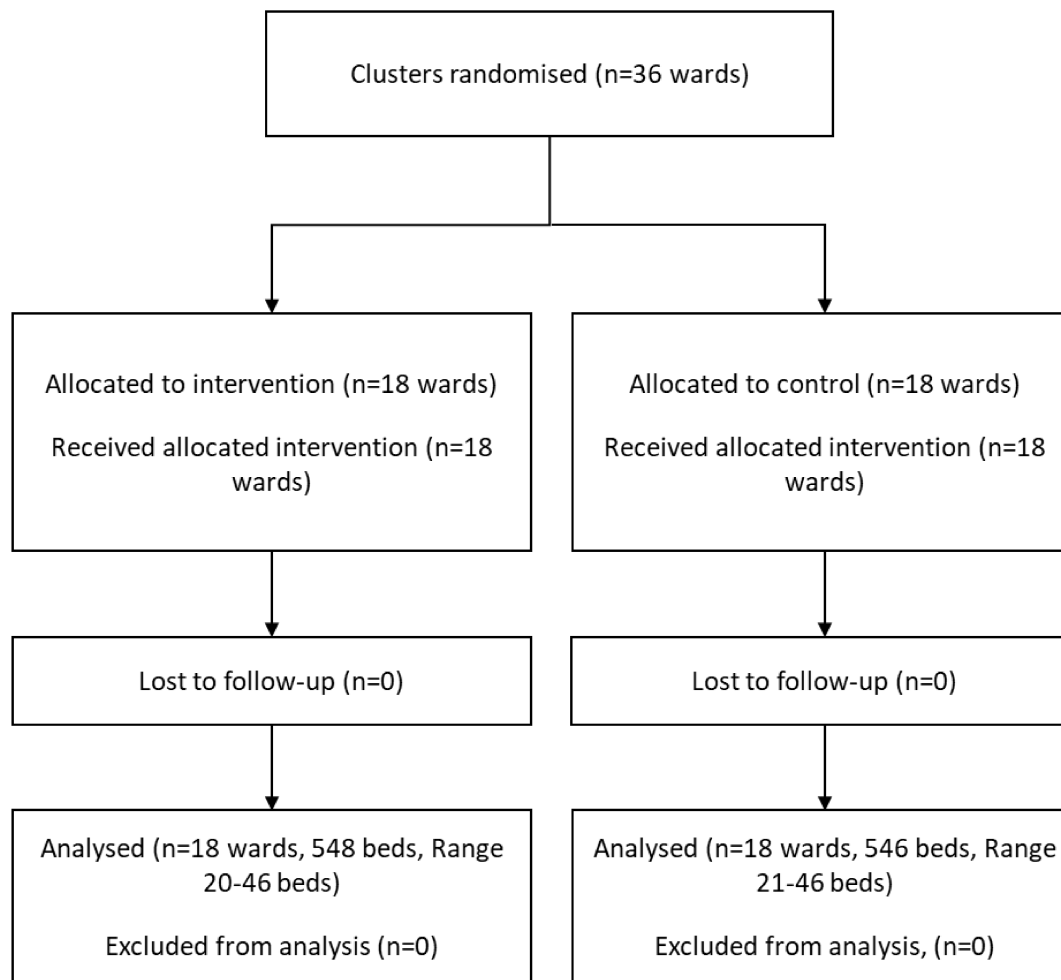

**Supplementary File 3: CONSORT Diagram for the phases of the PRONTO cluster randomised controlled trial.**
